# Supplementary material for: Frustration between two- and three-dimensional smectic ordering leads to a biaxial nematic phase
Source: Royal Society of Chemistry journal article supplement (doi:10.1039/c9sm01809c), 2019-12-11
Supplement: c9sm01809c1.pdf [file c9sm01809c1.pdf]

## Supplementary Information for Frustration between two- and three-dimensional smectic ordering leads to a biaxial nematic phase

Dong Chen,<sup>a,b,c</sup> David A. Coleman,<sup>c</sup> Chenhui Zhu,<sup>c</sup> Nattaporn Chattham,<sup>c,d</sup> Frank Jenz,<sup>c,e</sup> Xiaohong  
Cheng,<sup>f,g</sup> Carsten Tschierske,<sup>f</sup> Matthew A. Glaser,<sup>c</sup> Joseph E. MacLennan,<sup>c</sup> and Noel A. Clark<sup>c</sup>

<sup>a</sup>Institute of Process Equipment, College of Energy Engineering, Zhejiang University,  
Zheda Road No.38, Hangzhou, 310027, China

<sup>b</sup>State Key Laboratory of Fluid Power and Mechatronic Systems, Zhejiang University,  
Zheda Road No. 38, Hangzhou, 310027, China

<sup>c</sup>Department of Physics and Soft Materials Research Center, University of Colorado,  
Boulder, CO 80309-0390, USA

<sup>d</sup>Department of Physics, Faculty of Science, Kasetsart University, Bangkok, 10900, Thailand

<sup>e</sup>Institute of Physical Chemistry, University of Stuttgart, D-70569 Stuttgart, Germany

<sup>f</sup>Institute of Organic Chemistry, Martin-Luther-University, D-06108, Halle, Germany

<sup>g</sup>Department of Chemistry, Key Laboratory of Medicinal Chemistry for Natural Resources,  
Yunnan University, Kunming, Yunnan 650091, China

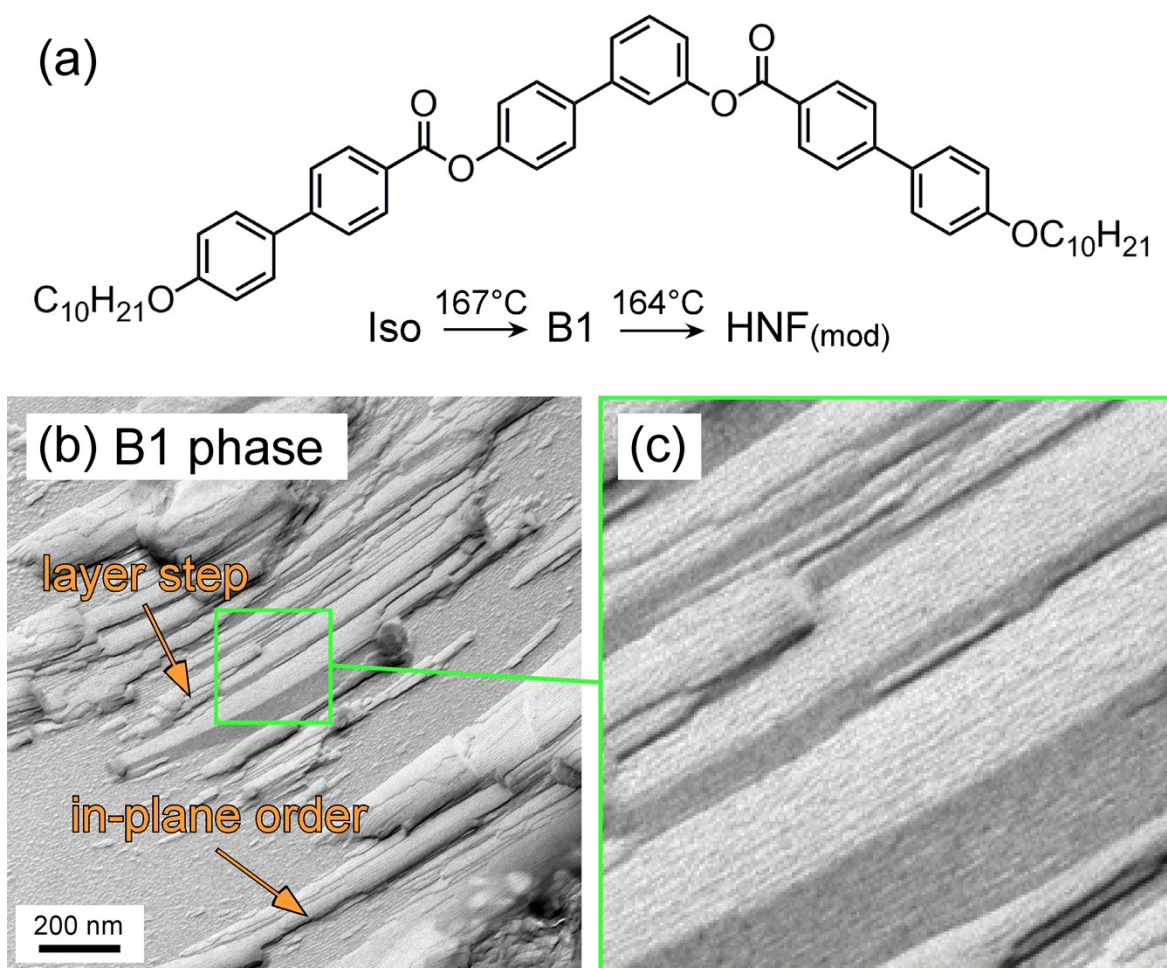

Figure S1: FFTEM images showing the character of fracture surfaces of a lamellar smectic phase with in-plane modulation of a bent-core mesogen. (a) Chemical structure and phase sequence of a homologue of biphenyl-3,4'-diyl bis-(4'-alkoxybiphenyl-4-carboxylate) [1]. (b) FFTEM image of the smectic B1 banana phase, showing layer steps and layers with, periodic ordering in two-dimensions, magnified in (c).

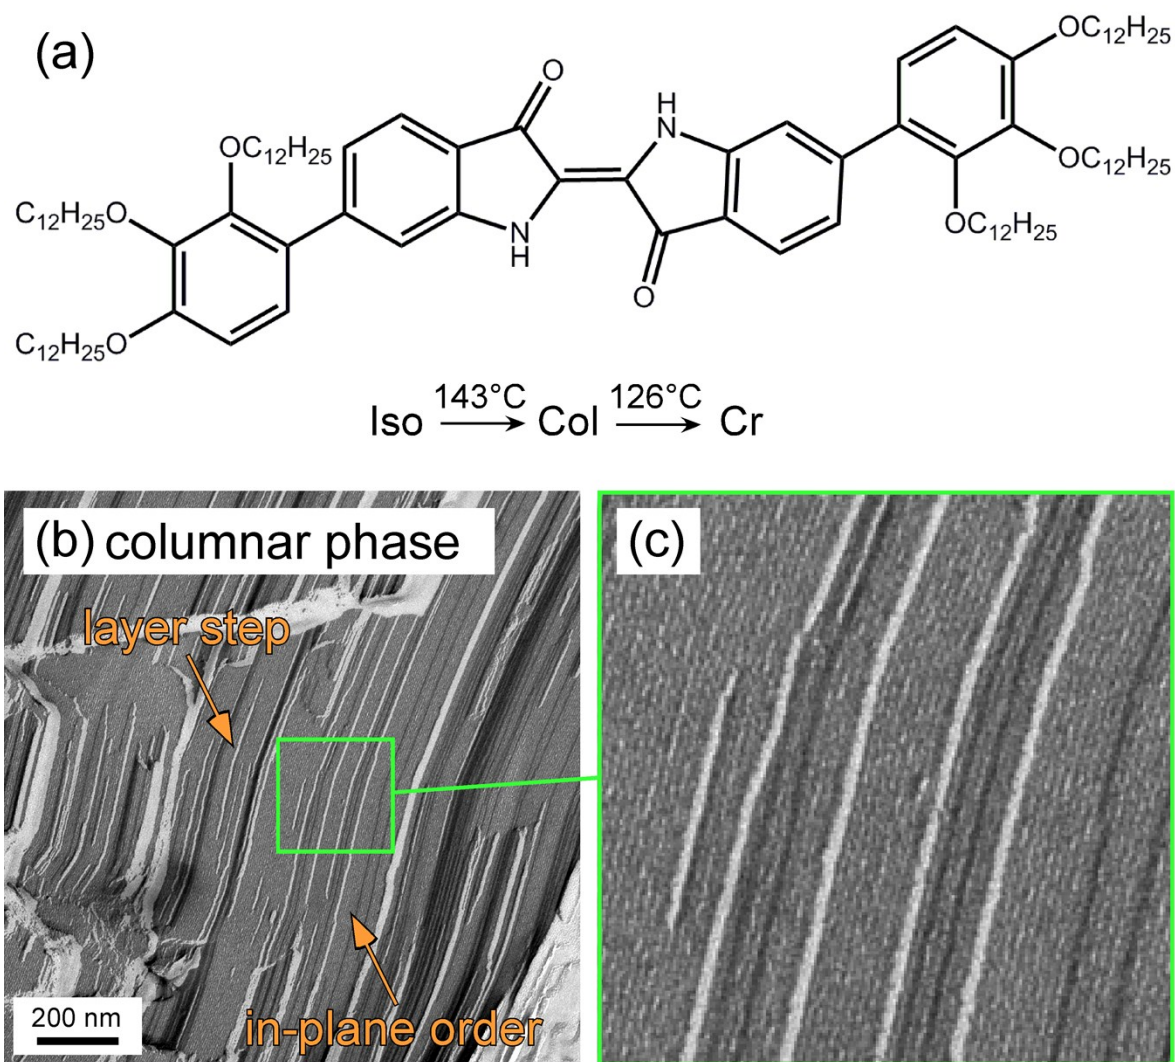

Figure S2: FFTEM images showing the character of fracture surfaces of a well-ordered columnar phase. (a) Chemical structure and phase sequence of phasmidic indigo derivative with 2,3,4-tridodecyloxyphenyl substituents [2]. (b) FFTEM image of the columnar phase, showing two-dimensional, periodic ordering, magnified in (c). The columnar phase shows long-range ordered, periodic structures in two spatial dimensions.

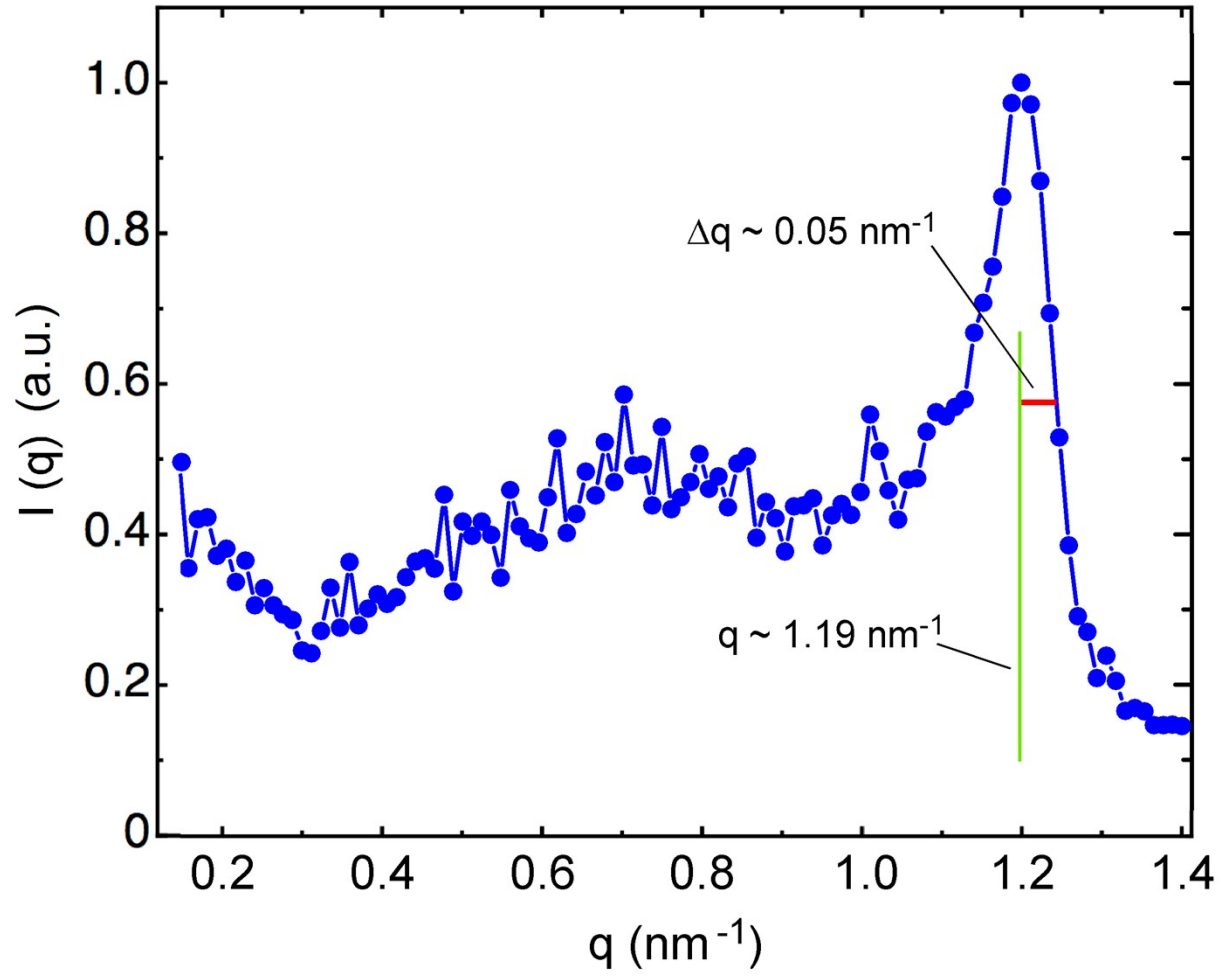

Figure S3: Radial intensity profile in wave vector  $q$  of the Fourier transform scattering pattern of Figure 3e. The peak at about  $1.19 \text{ nm}^{-1}$  corresponds to an average FFTEM stripe spacing of around  $5 \text{ nm}$ .

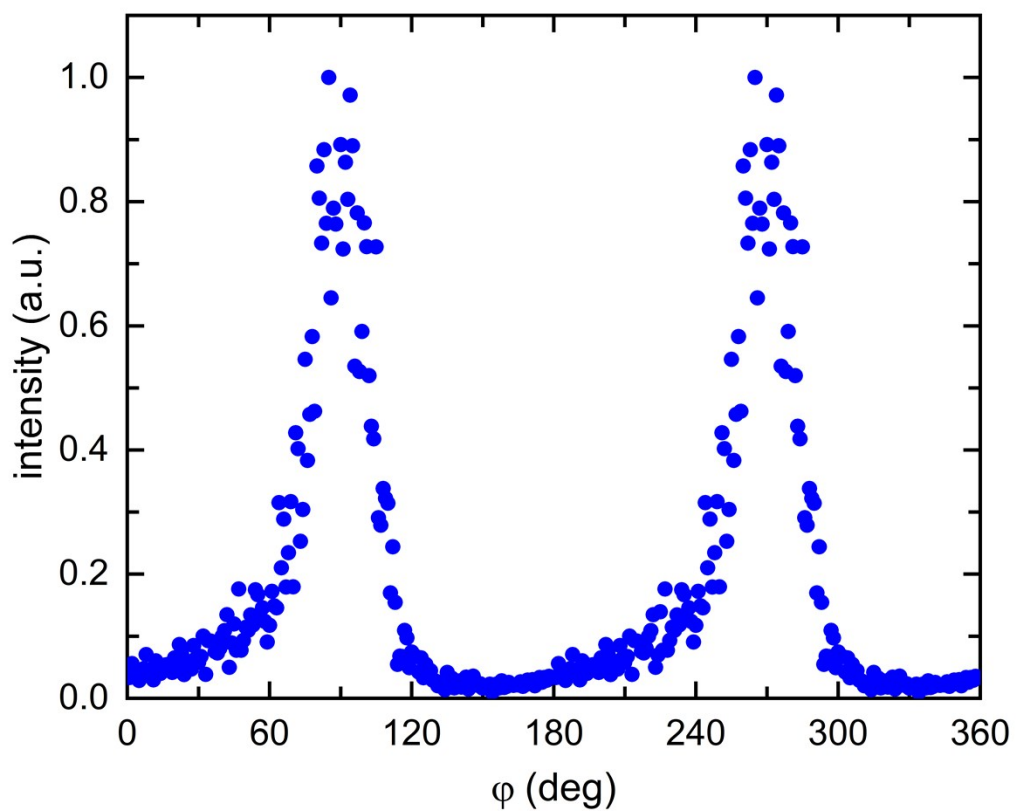

Figure S4: Intensity vs. azimuthal angle  $\phi$  derived from the Fourier transform scattering pattern shown in Figure 3e. The broad peaks reflect the orientational anisotropy of the in-plane smectic layering.

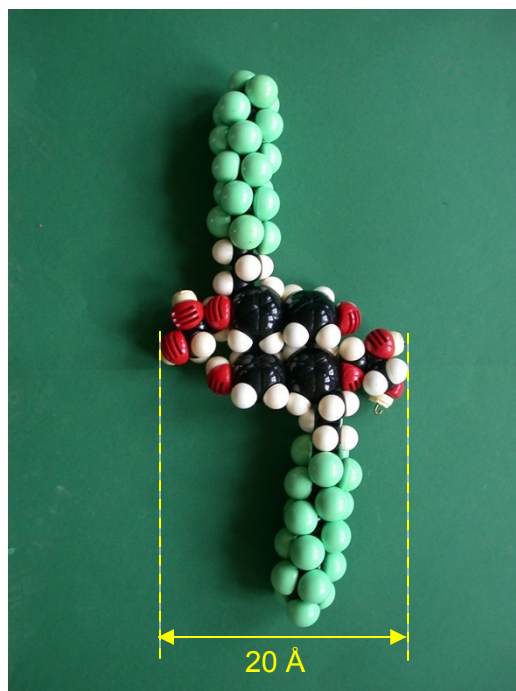

Figure S5. Space-filling molecular model showing two CT2 molecules. The rod-like molecular cores form an antiparallel, fully intercalated pair, giving an in-plane periodicity of  $d = 20 \text{ \AA}$ .

## References

- 
- [1] E. Tsai, J. M. Richardson, E. Korblova, M. Nakata, D. Chen, Y. Shen, R. Shao, N. A. Clark, and D. M. Walba, *Angew. Chem. Int. Ed.* **52**, 5254-5257 (2013).
  - [2] J. H. Porada and D. Blunk, *J. Mater. Chem.* **20**, 2956-2958 (2010).
